# Supplementary material
Source: publisher figshare collection journal article supplement (https://acs.figshare.com/ndownloader/files/10302471)
Supplement: Supplementary file 1 [file 10302471]

## Supporting Information for

### **A Smartphone-Based VOC Sensor Using Colorimetric Polydiacetylenes**

Dong-Hoon Park<sup>1</sup>, Jung-Moo Heo<sup>1</sup>, Woomin Jeong<sup>1</sup>, Young Hyuk Yoo<sup>2</sup>, Bum Jun Park<sup>3\*</sup>,  
and Jong-Man Kim<sup>1,4\*</sup>

<sup>1</sup> *Department of Chemical Engineering, Hanyang University, Seoul 04763, Korea*

<sup>2</sup> *Department of Computer Software, Kwangwoon University, Seoul 01897, Korea*

<sup>3</sup> *Department of Chemical Engineering, Kyung Hee University, Yongin 17104, Korea*

<sup>4</sup> *Institute of Nano Science and Technology, Hanyang University, Seoul 04763, Korea*

\*E-mail: jmk@hanyang.ac.kr (J.-M. Kim), bjpark@khu.ac.kr (B. J. Park)

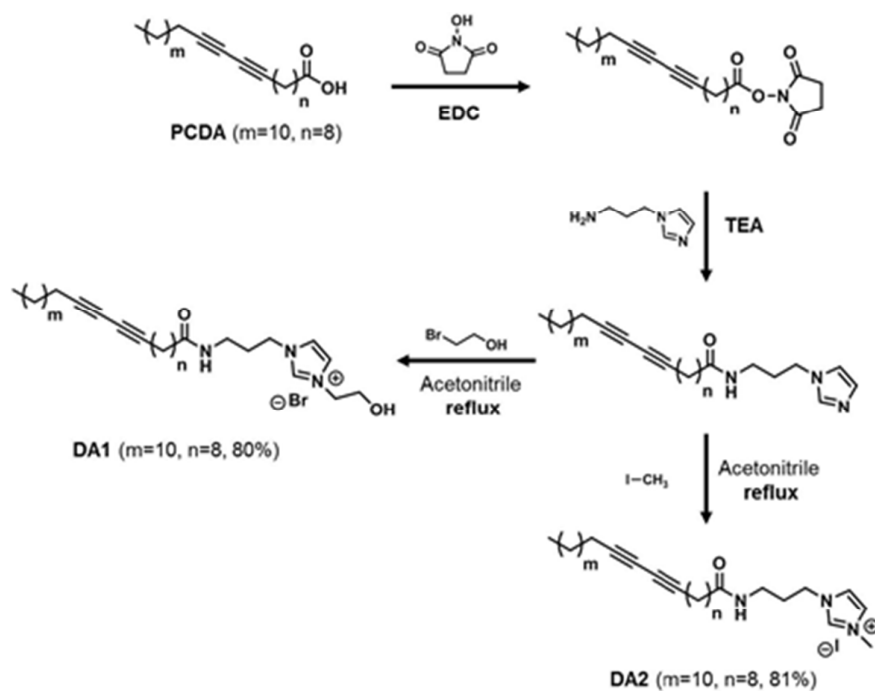

**Scheme S1.** Synthesis of DA1 and DA2.

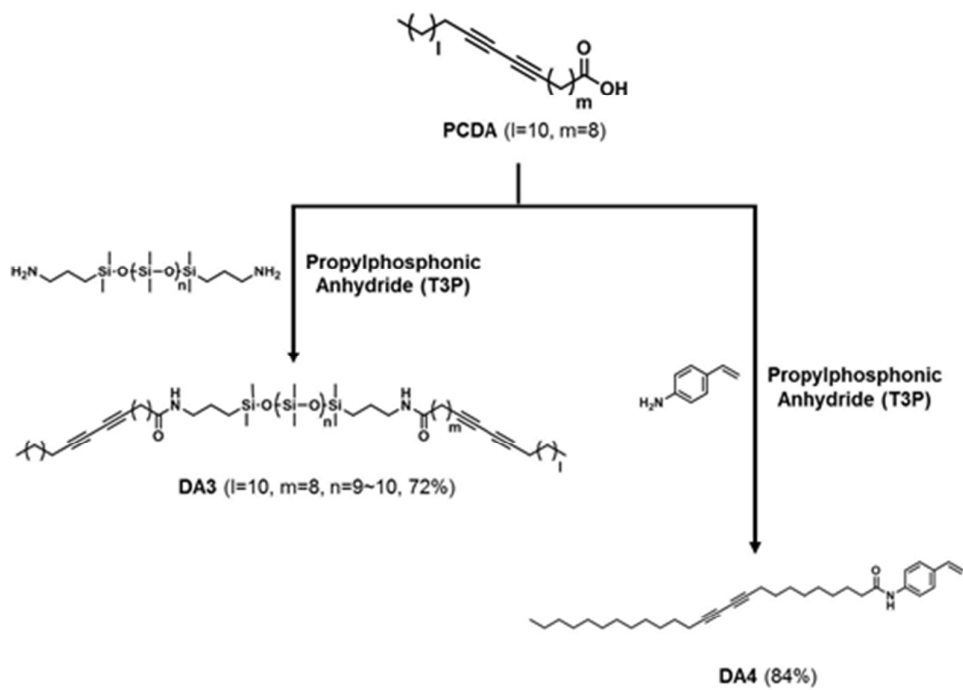

**Scheme S2.** Synthesis of DA3 and DA4.

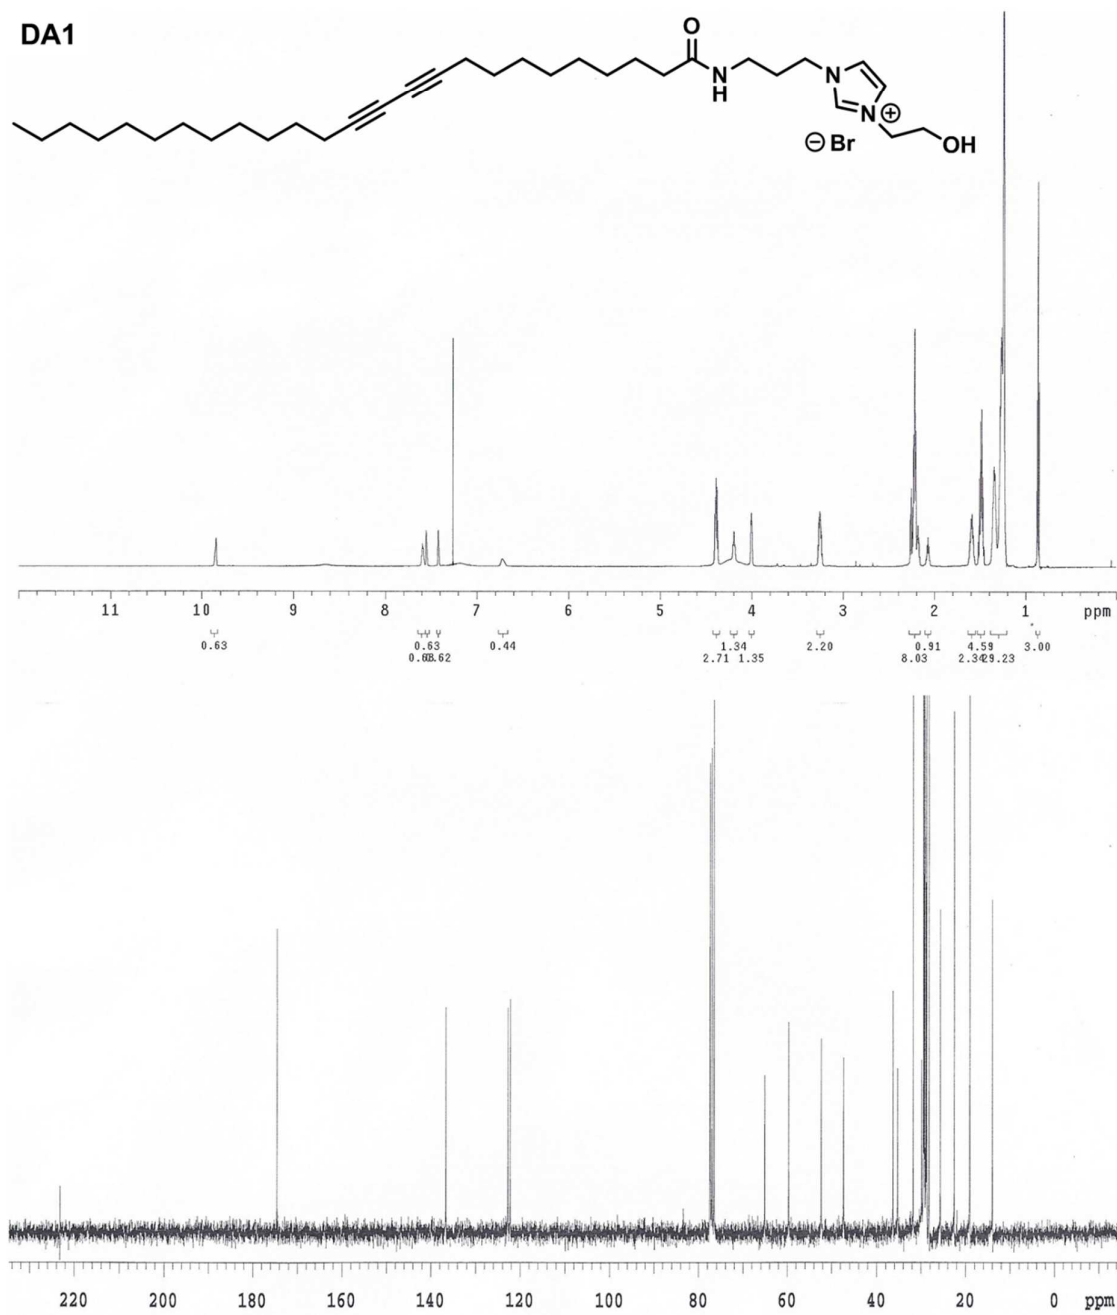

**Figure S1.** <sup>1</sup>H (top, 300 MHz) and <sup>13</sup>C (bottom, 75 MHz) NMR spectra of DA1 in CDCl<sub>3</sub>.

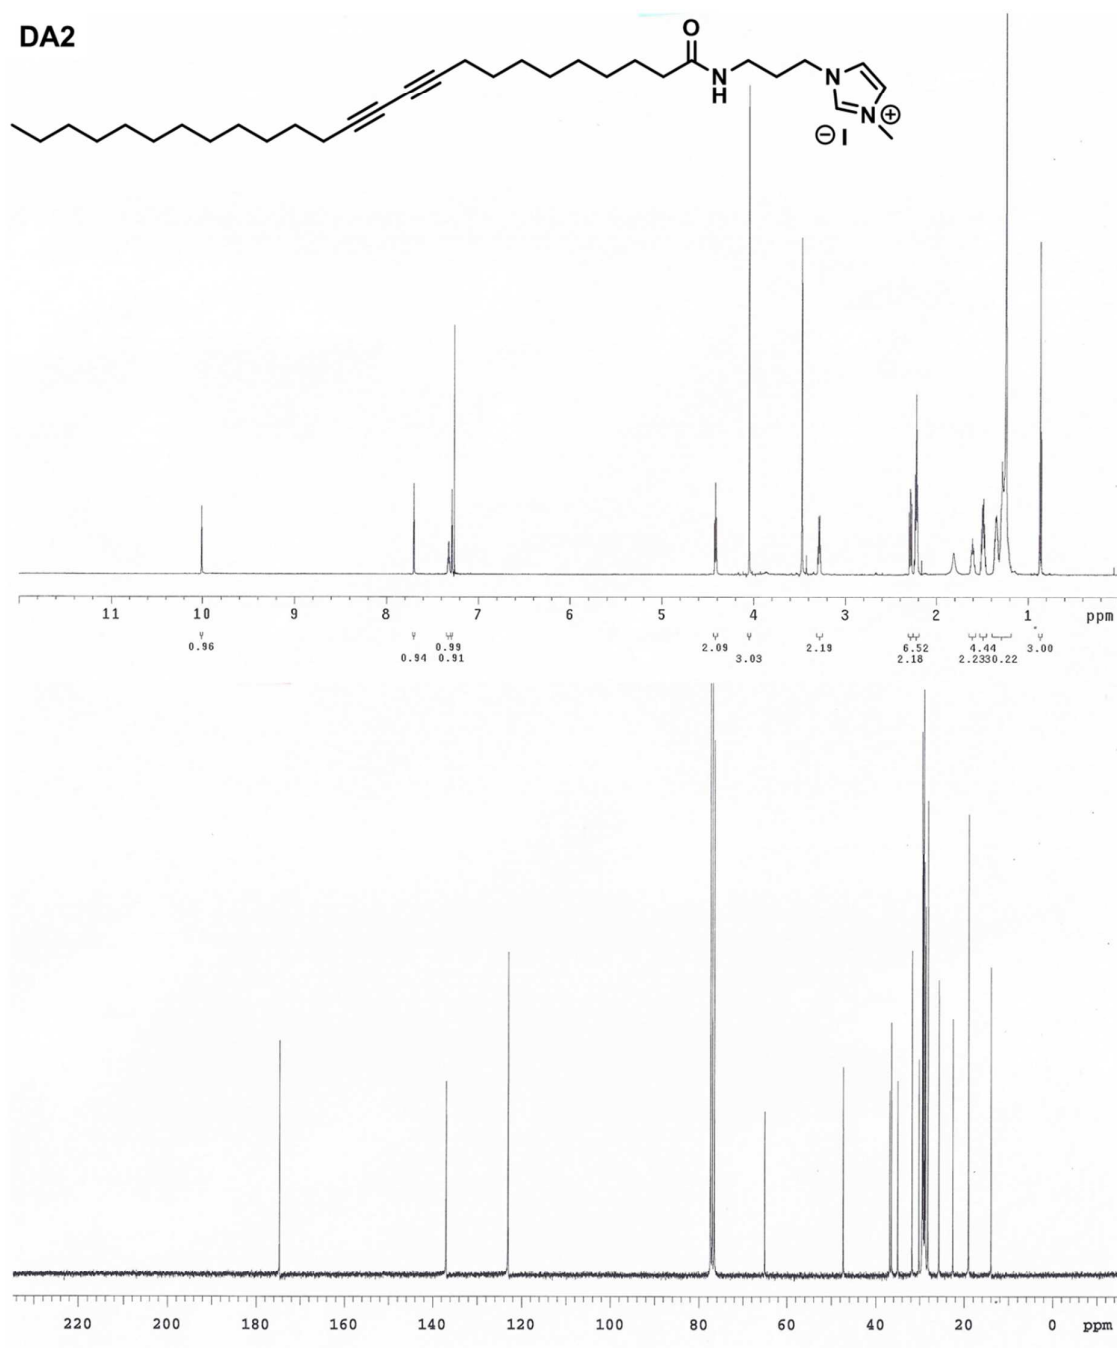

**Figure S2.**  $^1\text{H}$  (top, 300 MHz) and  $^{13}\text{C}$  (bottom, 75 MHz) NMR spectra of DA2 in  $\text{CDCl}_3$ .

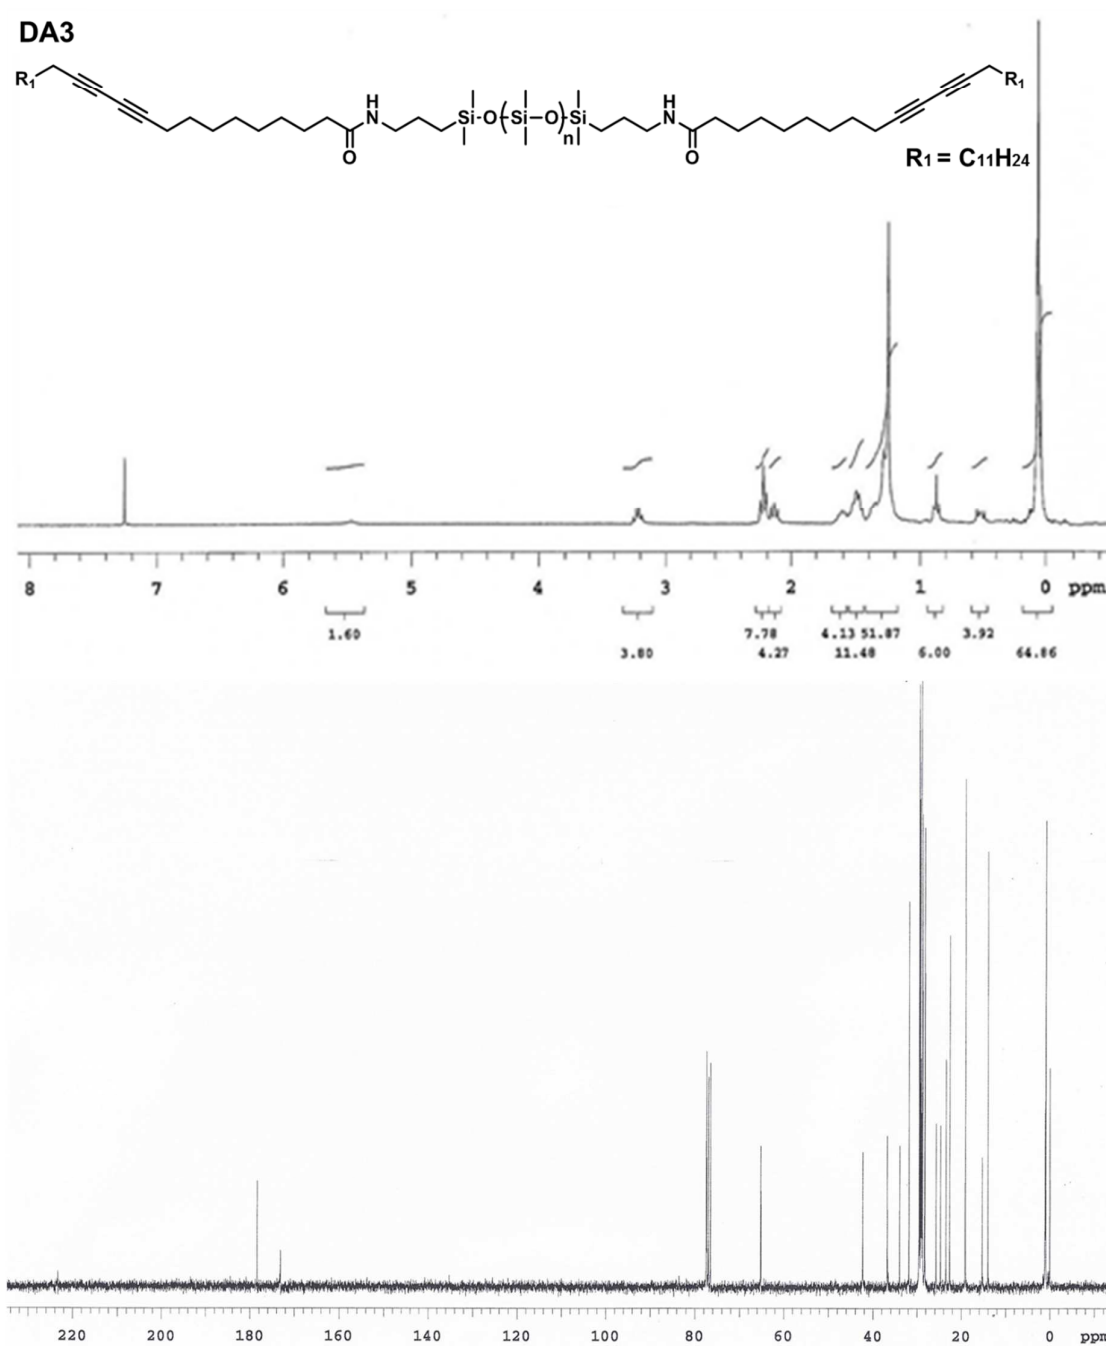

**Figure S3.**  $^1H$  (top, 300 MHz) and  $^{13}C$  (bottom, 75 MHz) NMR spectra of DA3 in  $CDCl_3$ .

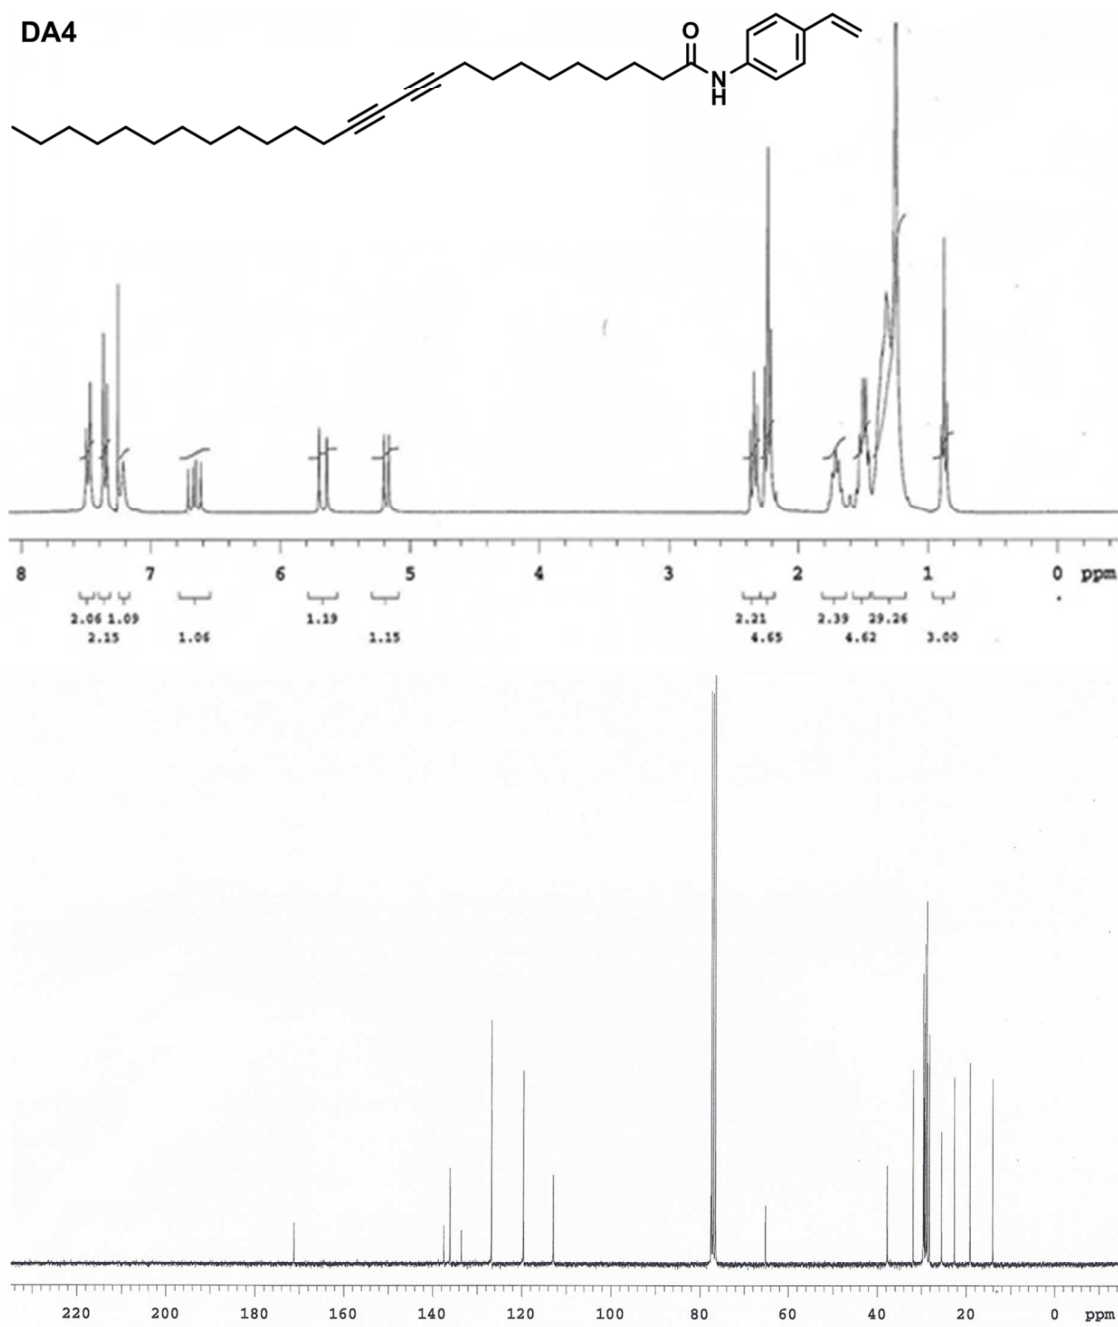

**Figure S4.**  $^1\text{H}$  (top, 300 MHz) and  $^{13}\text{C}$  (bottom, 75 MHz) NMR spectra of DA4 in  $\text{CDCl}_3$ .

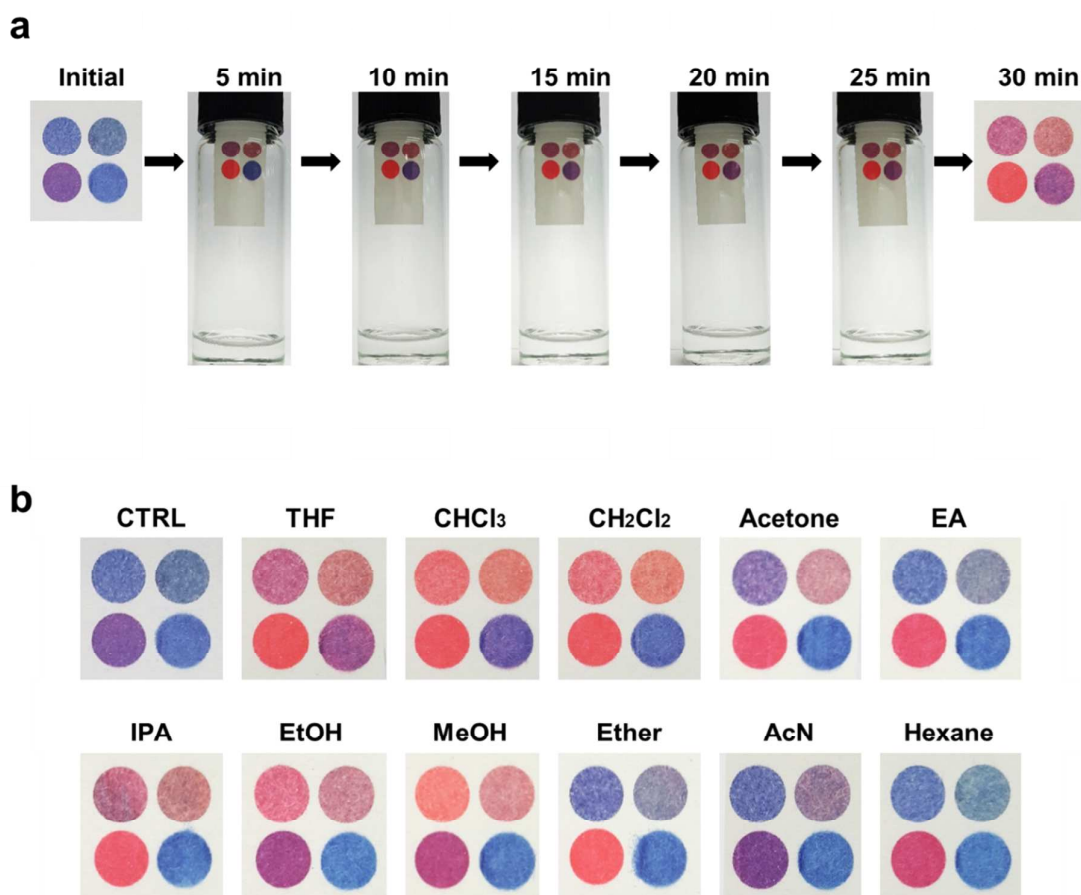

**Figure S5.** Vapochromic responses of the PDA array sensor. (a) Photographs showing the color change of the PDA sensor upon exposure to the THF vapor at ambient conditions. (b) Different color patterns when the PDA sensors were exposed to the eleven VOC gases.

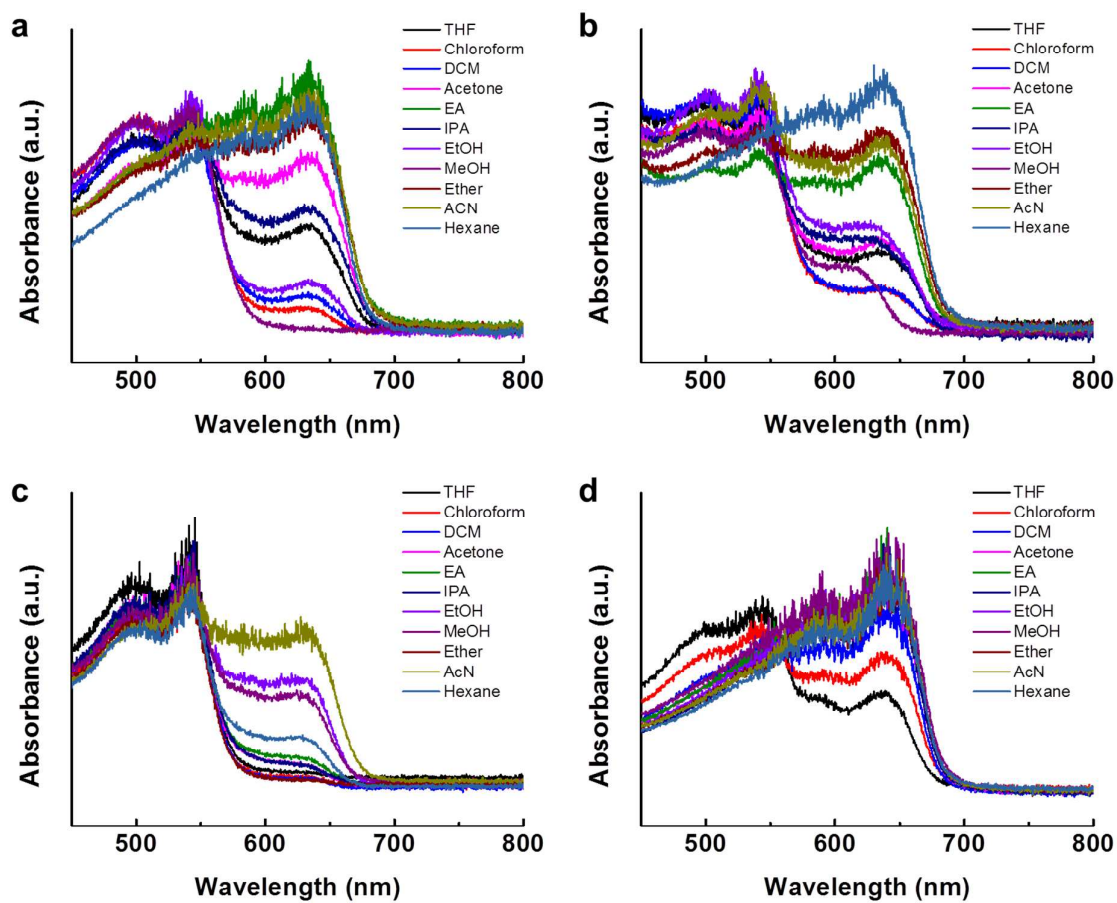

**Figure S6.** UV-vis absorbance spectra for vapochromic responses of (a) PDA1, (b) PDA2, (c) PDA3 and (d) PDA4 upon exposure to VOC gases.



**a**

| R value | THF     | CHCl <sub>3</sub> | CH <sub>2</sub> Cl <sub>2</sub> | Acetone | EA      | IPA     | EtOH    | MeOH    | Ether   | AcN     | Hexane  |
|---------|---------|-------------------|---------------------------------|---------|---------|---------|---------|---------|---------|---------|---------|
| PDA1    | 145-165 | 180-200           | 178-195                         | 108-128 | 85-105  | 123-158 | 160-185 | 185-205 | 80-108  | 80-105  | 82-105  |
| PDA2    | 150-170 | 170-190           | 175-195                         | 151-171 | 105-125 | 130-155 | 130-155 | 145-170 | 95-120  | 100-120 | 88-112  |
| PDA3    | 170-200 | 185-205           | 188-208                         | 175-195 | 170-190 | 140-192 | 105-128 | 115-135 | 183-203 | 82-105  | 142-161 |
| PDA4    | 107-127 | 85-110            | 77-97                           | 70-95   | 70-95   | 65-90   | 65-90   | 65-90   | 65-85   | 65-85   | 67-87   |

**b**

| H value | THF     | CHCl <sub>3</sub> | CH <sub>2</sub> Cl <sub>2</sub> | Acetone | EA      | IPA     | EtOH    | MeOH    | Ether   | AcN     | Hexane  |
|---------|---------|-------------------|---------------------------------|---------|---------|---------|---------|---------|---------|---------|---------|
| PDA1    | 322-338 | 345-355           | 340-360                         | 250-260 | 221-231 | 320-340 | 335-350 | 345-360 | 225-245 | 225-240 | 210-235 |
| PDA2    | 340-360 | 350-360           | 350-360                         | 340-350 | 225-240 | 335-350 | 345-355 | 345-360 | 230-250 | 270-285 | 202-220 |
| PDA3    | 340-360 | 345-360           | 345-355                         | 240-350 | 338-353 | 340-350 | 300-315 | 315-330 | 340-360 | 260-280 | 330-345 |
| PDA4    | 290-310 | 235-255           | 220-235                         | 215-230 | 217-227 | 215-230 | 215-225 | 215-230 | 215-235 | 215-230 | 210-230 |

**Table S1.** Database of the normalized R (a) and H (b) values for vapochromic responses of PDAs.
